# Supplementary material for: Expanding the phylogenetic distribution of cytochrome b-containing methanogenic archaea sheds light on the evolution of methanogenesis
Source: PubMed Central journal article supplement (PMC9478090; doi:10.1038/s41396-022-01281-0), 2022-07-09
Supplement: 41396_2022_1281_MOESM1_ESM.pdf [file 41396_2022_1281_MOESM1_ESM.pdf]

**Supplementary Information:**

**Expanding the phylogenetic distribution of cytochrome *b*-containing methanogenic archaea sheds light on the evolution of methanogenesis**

Ya-Fei Ou<sup>1†</sup>, Hong-Po Dong<sup>1\*†</sup>, Simon J. McIlroy<sup>2</sup>, Sean A. Crowe<sup>3,4</sup>, Steven J. Hallam<sup>4</sup>, Ping Han<sup>5</sup>, Jens Kallmeyer<sup>6</sup>, Rachel L. Simister<sup>3,4</sup>, Aurele Vuillemin<sup>6</sup>, Andy O. Leu<sup>2</sup>, Zhanfei Liu<sup>7</sup>, Yan-Ling Zheng<sup>5</sup>, Qian-Li Sun<sup>1</sup>, Min Liu<sup>5</sup>, Gene W. Tyson<sup>2</sup>, Li-Jun Hou<sup>1\*</sup>

<sup>1</sup>State Key Laboratory of Estuarine and Coastal Research, East China Normal University, Shanghai 200241, China; <sup>2</sup>Centre for Microbiome Research, School of Biomedical Sciences, Queensland University of Technology (QUT), Translational Research Institute, Queensland 4102, Australia; <sup>3</sup>Ecosystem Services, Commercialization Platforms, and Entrepreneurship (ECOSCOPE) Training Program, University of British Columbia, Vancouver, British Columbia, Canada; <sup>4</sup>Department of Microbiology & Immunology, University of British Columbia, Vancouver, British Columbia, Canada; <sup>5</sup>Key Laboratory of Geographic Information Science, Ministry of Education, East China Normal University, Shanghai 200241, China; <sup>6</sup>GFZ German Research Centre for Geosciences, Helmholtz Centre Potsdam, Potsdam, Germany; <sup>7</sup>Marine Science Institute, The University of Texas at Austin, Port Aransas, TX 78373, USA.

## Supplementary text

### Mcr complex tertiary structure

Conformation of the H03B1 McrABG subunits were analyzed with I-TASSER [1] v. 5.1 using the default setting. For McrA, McrB, and McrG, the displayed structural models (Supplementary Fig. 13b) were overlaid on the *Methanosarcina barkeri* Mcr crystal structure (PDB ID: 1e6y). The structural alignment TM-scores for McrA, McrB, and McrG were 0.980, 0.964, and 0.930, respectively, while the RMSDs of the TM-aligned residues were 0.56, 0.97, and 0.99 Å for McrA, McrB, and McrG, respectively. The binding sites for CoM, CoB, and F<sub>430</sub> in McrA were analyzed using COACH package in I-TASSER, showing that they were identical between H03B1 and the *Methanosarcina barkeri* Mcr crystal structure (Supplementary Fig. 13c).

### Vertical distribution of the ‘*Ca. Methylarchaeales*’ in sampling sites

To probe vertical distribution of the ‘*Ca. Methylarchaeales*’ MAGs in sediment cores of sampling sites, the H03B1 genome was used to recruit reads from six metagenomes generated from Techeng Island while HK01M, HK01B, HK02M1, and HK02M2 recruit reads from five metagenomes generated from Dongzhai Harbour. Metagenomic reads were mapped to these MAGs using Bowtie2 (v.2.3.5; -no-unal) [2]. The resulting SAM files were converted to BAM files with samtools [3]. CoverM (<https://github.com/wwood/CoverM>) was used to screen for reads with  $\geq 95\%$  identity and  $\geq 75\%$  alignment length. Read counts were used to compute reads per kbp of each genome per Mbp of each metagenome (RPKM; (reads recruited to a genome/(length of genome in bp/1,000))/(total bp in metagenome/1,000,000)).

In total, relative abundance of these MAGs appeared to increase gradually with depth (Supplementary Fig. 4). They were very rare at the 15 cm depth below the surface (RPKM: 0.0001-0.0039). The highest values were observed at the 100 cm depth (PPKM: 0.0090-0.1726). This profile may be related to oxygen distribution in sediment. It has been reported that mangrove wetlands have high density of crab burrows, some of which can reach 30-40 cm depth [4]. By these burrows, oxygen is able to penetrate deep layers of sediment. In addition, the roots of mangrove plants

also can release substantial amounts of oxygen into the rhizosphere and affect biogeochemical processes around the roots. Based on the analyses, it is inferred that the ‘*Ca. Methylarchaeales*’ may be highly sensitive to oxygen. A previous study revealed that in most mangrove wetlands including our sampling sites, soil organic carbon content tended to reduce with increasing depth. The highest organic carbon content was observed in the upper fractions (0-10 cm and 10-20 cm) [5]. Thus, it seems that the abundance of the ‘*Ca. Methylarchaeales*’ is inversely correlated with the organic carbon content.

### **Environmental distribution of the ‘*Ca. Methylarchaeales*’**

In order to investigate distribution of the ‘*Ca. Methylarchaeales*’ in the environment, the 16S rRNA and *mcrA* genes from the ‘*Ca. Methylarchaeales*’ were used to screen for homologs across public sequence databases. Over 300 public metagenome datasets of non-human were obtained from the SRA database (<https://www.ncbi.nlm.nih.gov/sra/?term=>) and IMG/M database (<https://img.jgi.doe.gov/cgi-bin/m/main.cgi>). The SRA files were transformed to FASTQ with SRA Toolkit (<https://trace.ncbi.nlm.nih.gov/Traces/sra/sra.cgi?view=software>). Reads in each metagenome were mapped to 16S rRNA genes of the Silva v138.1 NR99 dereplicated database [6] and the ‘*Ca. Methylarchaeales*’ using BWA-MEM [7] with default parameters, and converted to a sorted indexed BAM file using samtools [3]. The BAM file was filtered using CoverM (<https://github.com/wwood/CoverM>) with filter mode to only retain hits with  $\geq 97\%$  identity and  $\geq 50\%$  alignment length to a 16S rRNA gene. Reads mapping to the ‘*Ca. Methylarchaeales*’ 16S rRNA genes were identified in the BAM file (Supplementary Table 3), and the percent coverage was calculated using samtools [3] with coverage mode. The highest percent alignment of the reference ‘*Ca. Methylarchaeales*’ 16S rRNA genes was reported (Supplementary Table 3). For screening using the *mcrA* gene, reads in metagenomes were mapped to a dataset of 196 *mcrA* genes (including *Thermoproteota*, *Asgardarchaeota* and *Euryarchaeota* superphylum *mcrA*) using BWA-MEM with default parameters. Then, the sorted and indexed BAM file was filtered using CoverM with filter mode. Reads

were counted if they met the defined cutoff values ( $\geq 85\%$  nucleotide identity and  $\geq 50\%$  alignment length) and reported for the ‘*Ca. Methylarchaeales*’ *mcrA* (Supplementary Table 3). Percent coverage of *mcrA* genes was computed as detailed for the 16S rRNA gene analysis.

Screening of the Silva 16S rRNA sequence database [6] identified two genes highly similar to 16S rRNA gene of the H03B1 MAG that were generated from anoxic, sulfide-rich bottom water of Lake Vilar (Spain) and likely represent members of the same family (AJ937875 and AJ937878,  $> 91\%$  identity;  $> 89\%$  alignment length) [8]. Searching of NCBI nr database did not find close homologs of the ‘*Ca. Methylarchaeales*’ McrA (Top hit is McrA of member of ‘*Ca. Korarchaeia*’, 74% aa identity). In addition, by mapping reads against a *mcrA* database and a 16S rRNA database, respectively, reads that were highly similar to the ‘*Ca. Methylarchaeales*’ *mcrA* genes ( $\geq 85\%$  nucleotide identity;  $\geq 50\%$  alignment length) and the 16S rRNA genes ( $\geq 97\%$  identity;  $\geq 50\%$  alignment length) were found in three metagenomes derived from mangrove wetlands and 10 metagenomes generated from sediments of Lake Towuti, Lake Matano and Gulf of Boni in Indonesia (Supplementary Table 3; Supplementary Fig. 5). These reads provided almost full-length alignment of the ‘*Ca. Methylarchaeales*’ *mcrA* genes (71.3-100%) and 16S rRNA genes (85.4-100%) (Supplementary Fig. 5a and b). The reads mapping to ‘*Ca. Methylarchaeales*’ *mcrA* genes were assembled using MEGAHIT, and the resulting McrA fragments clustered with ‘*Ca. Methylarchaeales*’ McrA sequences in phylogenetic tree (Supplementary Fig. 5c). Screening of metagenomes from marine sediments enriched in hydrocarbon compounds (deep-sea hydrothermal vents, petroleum seep), hot springs, mangrove wetlands, palm oil mill effluent, and rice paddy soils (Supplementary Table 3) also identified samples with positive hits to the ‘*Ca. Methylarchaeales*’ 16S rRNA gene but not the *mcrA* gene for this lineage. This is likely due to the low abundance of members of this lineage in these samples.

### **Heme biosynthetic pathway of the ‘*Ca. Methylarchaeales*’**

Given that all cytochromes use hemes as cofactors, we examined pathway of heme biosynthesis in ‘*Ca. Methylarchaeales*’. H03B1, HK01M, HK02M1, HK02M2,

TDP8, and TDP10 contained an almost complete set of genes encoding the archaeal pathway of heme biosynthesis (Fig. 2 and Supplementary Table 7). In this pathway, glutamyl-tRNA is first converted to uroporphyrinogen III by the five enzymes (HemA, HemL, HemB, HemC, and HemD) which is the common precursor in heme biosynthesis of all three domains of life [9]. And then uroporphyrinogen III is further transformed into heme via the five archaea-specific enzymes (SUMT, PC2-DH/sirB, Ahb-NirDH, Ahb-NirJ1, and Ahb-NirJ2), as previously reported in *M. barkeri* [10]. However, '*Ca. M. tengchongensis*' lacked most of genes in the heme biosynthesis pathway. It is unclear if these genes are in missing region of the genome or that an unknown pathway is responsible for heme synthesis. These results further support the presence of cytochromes involved in electron transport chain in '*Ca. Methanoinsularis*', '*Ca. Methanoporticola*' and '*Ca. Methanotowutia*'.

**Supplementary Table 4.** Characteristics of 16S rRNA and 23S rRNA genes in the ‘*Ca.* Methylarchaeales’ bins.

|          | MAGs                        | H03B1 | H03B2 | TDP8 | TDP10 | HK01M | HK01B |
|----------|-----------------------------|-------|-------|------|-------|-------|-------|
| 16S rRNA | Gene length (bp)            | 773   | 1500  | 803  | 913   | -     | -     |
|          | Contig/Scaffold length (bp) | 21597 | 50587 | 5479 | 31969 | -     | -     |
|          | Start position (bp)         | 0     | 17824 | 4674 | 3658  | -     | -     |
|          | End position (bp)           | 773   | 19324 | 5477 | 4571  | -     | -     |
| 23S rRNA | Gene length (bp)            | 1041  | 3034  | -    | 1193  | 3037  | 1019  |
|          | Contig/Scaffold length (bp) | 29149 | 50587 | -    | 31969 | 19492 | 4339  |
|          | Start position (bp)         | 0     | 19476 | -    | 1     | 16245 | 1     |
|          | End position (bp)           | 1041  | 22510 | -    | 1194  | 19281 | 1019  |

**Supplementary Table 8.** Conserved active sites of methyl-coenzyme M reductase subunit alpha identified by Ermler et al [11].

| Residues      | Proposed Function              | <i>Eurarchaeota</i><br>superphylum | ' <i>Ca.</i><br>Bathy-<br>archaeia' | ' <i>Ca.</i> Kor-<br>archaeia' | ' <i>Ca.</i> Nezh-<br>archaeales' | ' <i>Ca.</i><br>Methano-<br>methylicaes' | ' <i>Ca.</i><br>Methylarchaeales'<br>(This study) |
|---------------|--------------------------------|------------------------------------|-------------------------------------|--------------------------------|-----------------------------------|------------------------------------------|---------------------------------------------------|
| $\alpha$ '147 | F430 axial ligand              | Gln                                | Gln                                 | Gln                            | Gln                               | Gln                                      | Gln                                               |
| $\alpha$ '225 | CoB interacting                | Arg                                | Arg                                 | Arg                            | Arg                               | Arg                                      | Arg                                               |
| $\alpha$ '256 | CoB interacting                | Lys                                | Lys                                 | Lys                            | Lys                               | Lys                                      | Lys                                               |
| $\alpha$ '257 | CoB interacting,<br>methylated | His                                | His                                 | His                            | His                               | His                                      | His                                               |
| $\alpha$ 270  | CoB interacting                | Arg                                | <b>Gln</b>                          | Arg                            | Arg                               | Arg                                      | Arg                                               |
| $\alpha$ 271  | Methylated                     | Arg                                | Arg                                 | Arg                            | Arg                               | Arg                                      | Arg                                               |
| $\alpha$ 330  | Substrate cavity wall          | Phe                                | Phe                                 | Phe                            | Phe                               | Phe                                      | Phe                                               |
| $\alpha$ 333  | COM interacting                | Tyr                                | <b>Thr</b>                          | Tyr                            | Tyr                               | Tyr                                      | Tyr                                               |
| $\alpha$ 400  | Methylated                     | Gln                                | <b>His</b>                          | Gln                            | Gln                               | Gln                                      | Gln                                               |
| $\alpha$ 443  | COM interacting                | Phe                                | <b>Trp</b>                          | Phe                            | Phe                               | Phe                                      | Phe                                               |
| $\alpha$ 445  | Thiol substituted              | Gly                                | Gly                                 | Gly                            | Gly                               | Gly                                      | Gly                                               |
| $\alpha$ 452  | Methylated                     | Cys                                | <b>Ile</b>                          | <b>Met</b>                     | Cys                               | Cys                                      | <b>Ala/Ser</b>                                    |
| $\alpha$ 481  | COB interacting                | Asn                                | <b>Thr/Ser</b>                      | Asn                            | Asn                               | Asn                                      | Asn                                               |

**Supplementary Table 10.** Genome characteristics of the ‘*Ca. Methylarchaeales*’ bins obtained using different assembly methods.

| Samples                     | H03B        |          | TDP7        |          | TDP9        |          |
|-----------------------------|-------------|----------|-------------|----------|-------------|----------|
|                             | H03B1       | H03B2    | TDP7        | TDP8     | TDP9        | TDP10    |
| AAI/ANI                     | 99.84/99.79 |          | 98.31/98.07 |          | 97.95/97.49 |          |
| Assembling tool             | MEGAHIT     | IDBA_UD  | MEGAHIT     | IDBA_UD  | MEGAHIT     | IDBA_UD  |
| Binning Method              | Metabat2    | Metabat2 | Metabat2    | Metabat2 | Metabat2    | Metabat2 |
| Length (Mbp)                | 1.46        | 1.48     | 2.32        | 2.55     | 2.08        | 2.45     |
| Completeness (%)            | 96.60       | 93.69    | 91.75       | 94.69    | 90.42       | 99.51    |
| Contamination (%)           | 0.97        | 0.97     | 1.94        | 0.97     | 0.00        | 0.97     |
| N50 (bp)                    | 25415       | 19579    | 5010        | 5614     | 14046       | 53503    |
| Number of contigs/scaffolds | 86          | 118      | 548         | 570      | 247         | 141      |
| GC content (%)              | 42.51       | 42.45    | 38.57       | 38.78    | 38.87       | 38.95    |
| 16S rRNA                    | Yes         | Yes      |             | Yes      |             | Yes      |
| <i>mcrABCDG</i>             | Yes         | Yes      | Yes         | Yes      | Yes         | Yes      |
| <i>hdrDE</i>                | Yes         | Yes      | Yes         | Yes      | Yes         | Yes      |
| <i>vhtAGC</i>               |             |          | Yes         | Yes      | Yes         | Yes      |
| Wood–Ljungdahl pathway      | Yes         | Yes      | Yes         | Yes      | Yes         | Yes      |



**Supplementary Table 11.** List of 122 archaeal-specific conserved marker genes from GTDB-Tk [12] used for phylogenetic inference.

| Marker ID  | Name            | Description                                                |
|------------|-----------------|------------------------------------------------------------|
| PF01990.12 | ATP-synt_F      | ATP synthase (F/14-kDa) subunit                            |
| PF01866.12 | Diphthamide_syn | Putative diphthamide synthesis protein                     |
| PF04104.9  | DNA_primase_lrg | Eukaryotic and archaeal DNA primase, large subunit         |
| PF01984.15 | dsDNA_bind      | Double-stranded DNA-binding domain                         |
| PF02006.11 | DUF137          | Protein of unknown function DUF137                         |
| PF04019.7  | DUF359          | Protein of unknown function (DUF359)                       |
| PF01864.12 | DUF46           | Putative integral membrane protein DUF46                   |
| PF04919.7  | DUF655          | Protein of unknown function (DUF655)                       |
| PF07541.7  | EIF_2_alpha     | Eukaryotic translation initiation factor 2 alpha subunit   |
| PF13685.1  | Fe-ADH_2        | Iron-containing alcohol dehydrogenase                      |
| PF01269.12 | Fibrillarin     | Fibrillarin                                                |
| PF00368.13 | HMG-CoA_red     | Hydroxymethylglutaryl-coenzyme A reductase                 |
| PF01798.13 | Nop             | Putative snoRNA binding domain                             |
| PF00687.16 | Ribosomal_L1    | Ribosomal protein L1p/L10e family                          |
| PF00466.15 | Ribosomal_L10   | Ribosomal protein L10                                      |
| PF00827.12 | Ribosomal_L15e  | Ribosomal L15                                              |
| PF01280.15 | Ribosomal_L19e  | Ribosomal protein L19e                                     |
| PF01157.13 | Ribosomal_L21e  | Ribosomal protein L21e                                     |
| PF01198.14 | Ribosomal_L31e  | Ribosomal protein L31e                                     |
| PF01655.13 | Ribosomal_L32e  | Ribosomal protein L32                                      |
| PF01090.14 | Ribosomal_S19e  | Ribosomal protein S19e                                     |
| PF01282.14 | Ribosomal_S24e  | Ribosomal protein S24e                                     |
| PF01200.13 | Ribosomal_S28e  | Ribosomal protein S28e                                     |
| PF01015.13 | Ribosomal_S3Ae  | Ribosomal S3Ae family                                      |
| PF00900.15 | Ribosomal_S4e   | Ribosomal family S4e                                       |
| PF01092.14 | Ribosomal_S6e   | Ribosomal protein S6e                                      |
| PF00410.14 | Ribosomal_S8    | Ribosomal protein S8                                       |
| PF01000.21 | RNA_pol_A_bac   | RNA polymerase Rpb3/RpoA insert domain                     |
| PF13656.1  | RNA_pol_L_2     | RNA polymerase Rpb3/Rpb11 dimerisation domain              |
| PF01194.12 | RNA_pol_N       | RNA polymerases N / 8 kDa subunit                          |
| PF03874.11 | RNA_pol_Rpb4    | RNA polymerase Rpb4                                        |
| PF01191.14 | RNA_pol_Rpb5_C  | RNA polymerase Rpb5, C-terminal domain                     |
| PF02978.14 | SRP_SPB         | Signal peptide binding domain                              |
| PF01868.11 | UPF0086         | Domain of unknown function UPF0086                         |
| PF01496.14 | V_ATPase_I      | V-type ATPase 116kDa subunit family                        |
| TIGR00021  | rpiA            | ribose 5-phosphate isomerase A                             |
| TIGR00037  | eIF_5A          | translation elongation factor IF5A                         |
| TIGR00042  | TIGR00042       | non-canonical purine NTP pyrophosphatase, RdgB/HAM1 family |
| TIGR00064  | ftsY            | signal recognition particle-docking protein FtsY           |
| TIGR00111  | pelota          | mRNA surveillance protein pelota                           |
| TIGR00134  | gatE_arch       | glutamyl-tRNA(Gln) amidotransferase, subunit E             |
| TIGR00240  | ATCase_reg      | aspartate carbamoyltransferase, regulatory subunit         |
| TIGR00264  | TIGR00264       | alpha-NAC homolog                                          |
| TIGR00270  | TIGR00270       | TIGR00270 family protein                                   |
| TIGR00279  | uL16_euk_arch   | ribosomal protein uL16                                     |
| TIGR00283  | arch_ptl2       | peptidyl-tRNA hydrolase                                    |
| TIGR00291  | RNA_SBDS        | rRNA metabolism protein, SBDS family                       |
| TIGR00293  | TIGR00293       | prefoldin, alpha subunit                                   |
| TIGR00307  | eS8             | ribosomal protein eS8                                      |
| TIGR00308  | TRM1            | N2,N2-dimethylguanosine tRNA methyltransferase             |

|           |                 |                                                                                 |
|-----------|-----------------|---------------------------------------------------------------------------------|
| TIGR00323 | eIF-6           | putative translation initiation factor eIF-6                                    |
| TIGR00324 | endA            | tRNA-intron lyase                                                               |
| TIGR00335 | primase_sml     | putative DNA primase, eukaryotic-type, small subunit                            |
| TIGR00336 | pyrE            | orotate phosphoribosyltransferase                                               |
| TIGR00337 | PyrG            | CTP synthase                                                                    |
| TIGR00373 | TIGR00373       | transcription factor E                                                          |
| TIGR00389 | glyS_dimeric    | glycine--tRNA ligase                                                            |
| TIGR00392 | ileS            | isoleucine--tRNA ligase                                                         |
| TIGR00398 | metG            | methionine--tRNA ligase                                                         |
| TIGR00405 | KOW_elon_Spt5   | transcription elongation factor Spt5                                            |
| TIGR00408 | proS_fam_I      | proline--tRNA ligase                                                            |
| TIGR00422 | valS            | valine--tRNA ligase                                                             |
| TIGR00425 | CBF5            | putative rRNA pseudouridine synthase                                            |
| TIGR00432 | arcsn_tRNA_tgt  | tRNA-guanine(15) transglycosylase                                               |
| TIGR00442 | hisS            | histidine--tRNA ligase                                                          |
| TIGR00448 | rpoE            | DNA-directed RNA polymerase                                                     |
| TIGR00456 | argS            | arginine--tRNA ligase                                                           |
| TIGR00458 | aspS_nondisc    | aspartate--tRNA(Asn) ligase                                                     |
| TIGR00463 | gltx_arch       | glutamate--tRNA ligase                                                          |
| TIGR00468 | pheS            | phenylalanine--tRNA ligase, alpha subunit                                       |
| TIGR00471 | pheT_arch       | phenylalanine--tRNA ligase, beta subunit                                        |
| TIGR00490 | aEF-2           | translation elongation factor aEF-2                                             |
| TIGR00491 | aIF-2           | translation initiation factor aIF-2                                             |
| TIGR00501 | met_pdase_II    | methionine aminopeptidase, type II                                              |
| TIGR00521 | coaBC_dfp       | phosphopantothenoylcysteine decarboxylase /phosphopantothenate--cysteine ligase |
| TIGR00522 | dph5            | diphthine synthase                                                              |
| TIGR00549 | mevalon_kin     | mevalonate kinase                                                               |
| TIGR00658 | orni_carb_tr    | ornithine carbamoyltransferase                                                  |
| TIGR00670 | asp_carb_tr     | aspartate carbamoyltransferase                                                  |
| TIGR00729 | TIGR00729       | ribonuclease HII                                                                |
| TIGR00936 | ahcY            | adenosylhomocysteinase                                                          |
| TIGR00982 | uS12_E_A        | ribosomal protein uS12                                                          |
| TIGR01008 | uS3_euk_arch    | ribosomal protein uS3                                                           |
| TIGR01012 | uS2_euk_arch    | ribosomal protein uS2                                                           |
| TIGR01018 | uS4_arch        | ribosomal protein uS4                                                           |
| TIGR01020 | uS5_euk_arch    | ribosomal protein uS5                                                           |
| TIGR01025 | uS19_arch       | ribosomal protein uS19                                                          |
| TIGR01028 | uS7_euk_arch    | ribosomal protein uS7                                                           |
| TIGR01038 | uL22_arch_euk   | ribosomal protein uL22                                                          |
| TIGR01046 | uS10_euk_arch   | ribosomal protein uS10                                                          |
| TIGR01052 | top6b           | DNA topoisomerase VI, B subunit                                                 |
| TIGR01060 | eno             | phosphopyruvate hydratase                                                       |
| TIGR01077 | L13_A_E         | ribosomal protein uL13                                                          |
| TIGR01080 | rplX_A_E        | ribosomal protein uL24                                                          |
| TIGR01213 | pseudo_Pus10arc | tRNA pseudouridine(54/55) synthase                                              |
| TIGR01309 | uL30_arch       | ribosomal protein uL30                                                          |
| TIGR01952 | nusA_arch       | NusA family KH domain protein, archaeal                                         |
| TIGR02076 | pyrH_arch       | putative uridylate kinase                                                       |
| TIGR02153 | gatD_arch       | glutamyl-tRNA(Gln) amidotransferase, subunit D                                  |
| TIGR02236 | recomb_radA     | DNA repair and recombination protein RadA                                       |
| TIGR02258 | 2_5_ligase      | 2'-5' RNA ligase                                                                |
| TIGR02338 | gimC_beta       | prefoldin, beta subunit                                                         |
| TIGR02389 | RNA_pol_rpoA2   | DNA-directed RNA polymerase, subunit A''                                        |
| TIGR02390 | RNA_pol_rpoA1   | DNA-directed RNA polymerase subunit A'                                          |

|           |                 |                                                  |
|-----------|-----------------|--------------------------------------------------|
| TIGR02651 | RNase_Z         | ribonuclease Z                                   |
| TIGR03626 | L3_arch         | ribosomal protein uL3                            |
| TIGR03627 | uS9_arch        | ribosomal protein uS9                            |
| TIGR03628 | arch_S11P       | ribosomal protein uS11                           |
| TIGR03629 | uS13_arch       | ribosomal protein uS13                           |
| TIGR03636 | uL23_arch       | ribosomal protein uL23                           |
| TIGR03653 | uL6_arch        | ribosomal protein uL6                            |
| TIGR03665 | arCOG04150      | arCOG04150 universal archaeal KH domain protein  |
| TIGR03670 | rpoB_arch       | DNA-directed RNA polymerase subunit B            |
| TIGR03671 | cca_archaeal    | CCA-adding enzyme                                |
| TIGR03672 | rpl4p_arch      | 50S ribosomal protein uL4                        |
| TIGR03673 | uL14_arch       | 50S ribosomal protein uL14                       |
| TIGR03674 | fen_arch        | flap structure-specific endonuclease             |
| TIGR03677 | eL8_ribo        | ribosomal protein eL8                            |
| TIGR03680 | ef2g_arch       | translation initiation factor 2, gamma subunit   |
| TIGR03683 | A-tRNA_syn_arch | alanine--tRNA ligase                             |
| TIGR03684 | arCOG00985      | arCOG04150 universal archaeal PUA-domain protein |
| TIGR03722 | arch_KAE1       | universal archaeal protein Kae1                  |

## **Legends for Suppl. Tables 1-3, Tables 5-7, Table 9, Table 12**

**Please note that these Suppl. Tables are provided in separate excel files.**

**Supplementary Table 1.** Statistics of high-quality (completeness of > 90% and contamination of < 5%) and medium-quality (completeness of > 70% and contamination of < 10%) archaeal bins recovered from 13 mangrove sediment samples.

**Supplementary Table 2.** BLAST results generated by searching reads from TDP7 and TDP9 against H03B1/HK01M/HK01B/HK02M1/HK02M2 McrA sequence using the BLASTX method of DIAMOND (cutoffs: e-value <1e-5, >85% identity, alignment length >80%).

**Supplementary Table 3.** Environmental distribution of the ‘*Ca. Methylarchaeales*’. The number and percent coverage of reads mapping to the ‘*Ca. Methylarchaeales*’ 16S rRNA genes (cutoffs:  $\geq$  97% identity and  $\geq$ 50% alignment length) are shown. The number and percent coverage of reads mapping to the ‘*Ca. Methylarchaeales*’ *mcrA* genes (cutoffs:  $\geq$  85% nucleotide identity and  $\geq$ 50% alignment length) are presented. The ID, sampling habitat, location, and size of the dataset are provided. ND, not detected.

**Supplementary Table 5.** The 16S rRNA gene similarity between the ‘*Ca. Methylarchaeales*’ and *Nitrososphaeria* that was obtained by pairwise comparison of the nucleotide sequences.

**Supplementary Table 6.** The average amino acid identity (AAI) between the ‘*Ca. Methylarchaeales*’ and *Nitrososphaeria* genomes that was obtained by pairwise comparison of orthologous genes.

**Supplementary Table 7.** The genes used for metabolic reconstruction in this study. The corresponding genes are also presented in the previously reported JZ-2-bin\_220 for comparison.

**Supplementary Table 9.** Reference archaeal genomes used in this study and distribution of genes for Mcr complex and energy-conserving complexes in archaea.

**Supplementary Table 12.** Methyl-coenzyme M reductase genes (*mcrABCDG*) identified by searching against Pfam using HMMER.

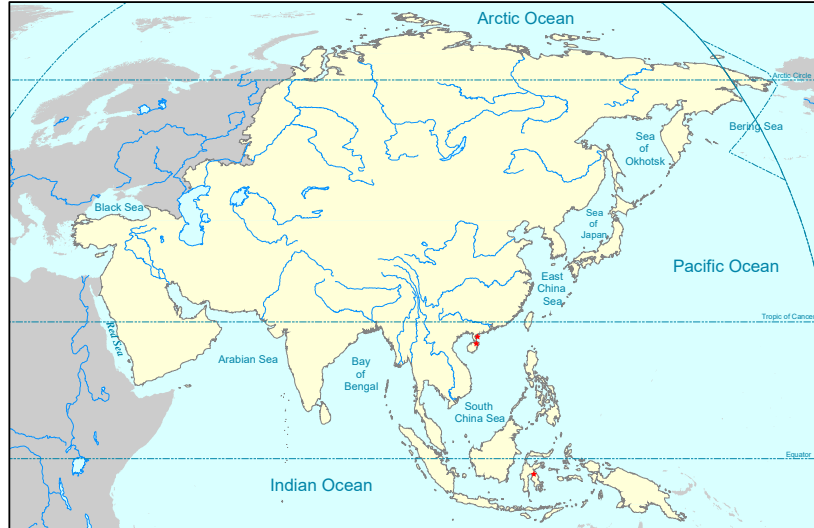

Techeng Island, Guangdong, China  
 Lon: 110°26'19.67"E  
 Lat: 21°9'10.80"N

Dongzhai Harbour, Haikou, China  
 Lon: 110°34'33.6"E  
 Lat: 19°56'57.0"N

Lake Towuti in Indonesia: South Sulawesi  
 Lon: 121°29'37.7"E  
 Lat: 2°46'21.4"S

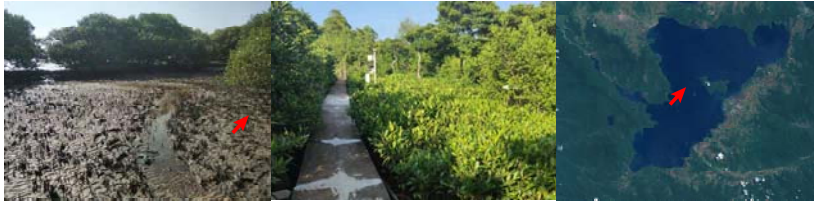

Sample sites

| Site name                                       | Interval (m) | Size (GB) | Platform     |
|-------------------------------------------------|--------------|-----------|--------------|
| <b>Techeng Island, Guangdong, China</b>         |              |           |              |
| H02S                                            | 0.15-0.20    | 60        | HiSeq 2500   |
| H02M                                            | 0.40-0.45    | 60        | HiSeq 2500   |
| H02B                                            | 0.95-1.00    | 60        | HiSeq 2500   |
| H03S                                            | 0.15-0.20    | 60        | HiSeq 2500   |
| H03M                                            | 0.40-0.45    | 60        | HiSeq 2500   |
| H03B                                            | 0.95-1.00    | 60        | HiSeq 2500   |
| <b>Dongzhai Harbour, Haikou, China</b>          |              |           |              |
| HK01S                                           | 0.15-0.20    | 100       | HiSeq 2500   |
| HK01M                                           | 0.40-0.45    | 100       | HiSeq 2500   |
| HK01B                                           | 0.95-1.00    | 100       | HiSeq 2500   |
| HK02S                                           | 0.15-0.20    | 100       | HiSeq 2500   |
| HK02M                                           | 0.40-0.45    | 100       | HiSeq 2500   |
| HK03S                                           | 0.15-0.20    | 100       | HiSeq 2500   |
| HK03M                                           | 0.40-0.45    | 100       | HiSeq 2500   |
| <b>Lake Towuti in Indonesia: South Sulawesi</b> |              |           |              |
| TDP7                                            | NULL         | 41        | NovaSeq 6000 |
| TDP9                                            | NULL         | 37        | NovaSeq 6000 |

**Supplementary Fig. 1.** Locations of the sampling stations for metagenomes.

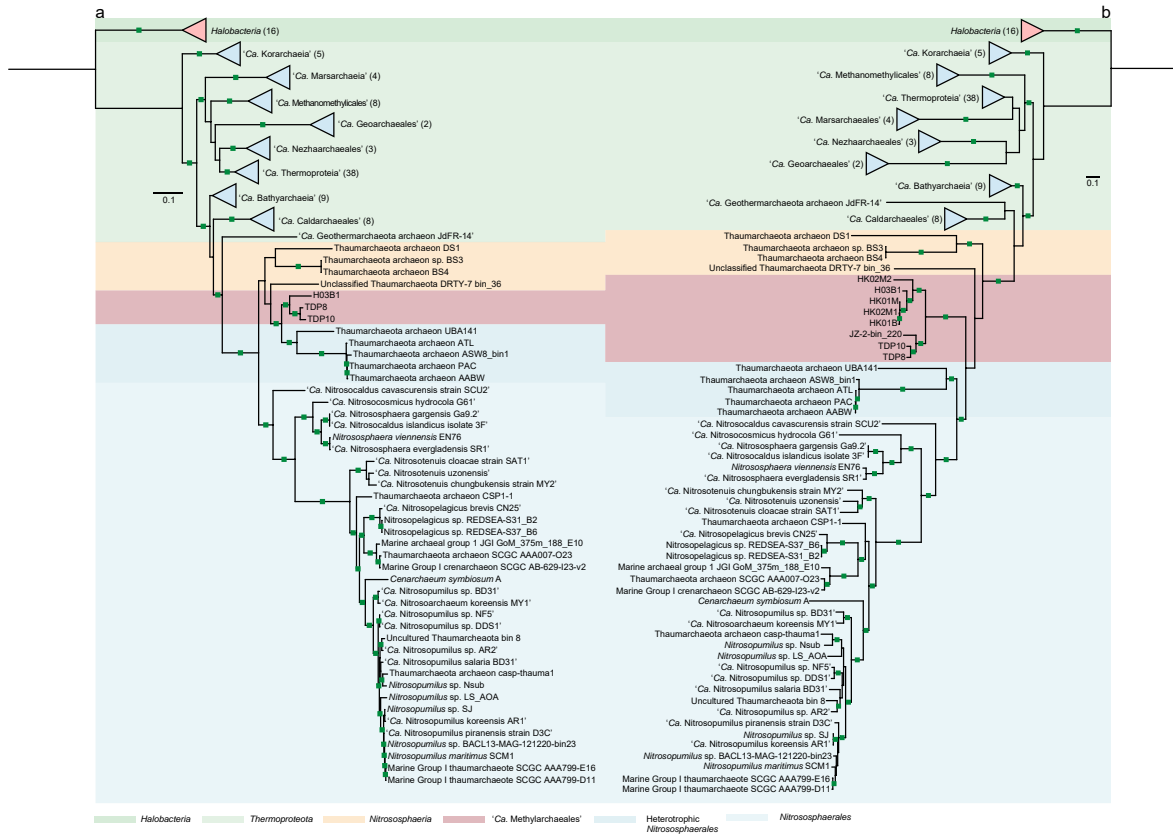

**Supplementary Fig. 2.** Phylogenetic placement of the '*Ca. Methylarchaeales*'. **a.** Maximum-likelihood tree of concatenated 16S and 23S rRNA genes inferred using IQ-TREE [-m TEST (GTR+F+I+G4), -bb 1000]. The *Halobacteria* class was used as an outgroup. The 23S rRNA gene is missing in TDP8 genome. **b.** Maximum-likelihood tree of a concatenated set of 122 archaeal-specific marker genes inferred with IQ-TREE (LG+F+I+G4, -bb 1000), showing the placement of the '*Ca. Methylarchaeales*' in *Thermoproteota* phylum. The *Halobacteria* class was used as an outgroup. The bootstrap support values  $\geq 95$  are indicated with green filled squares.

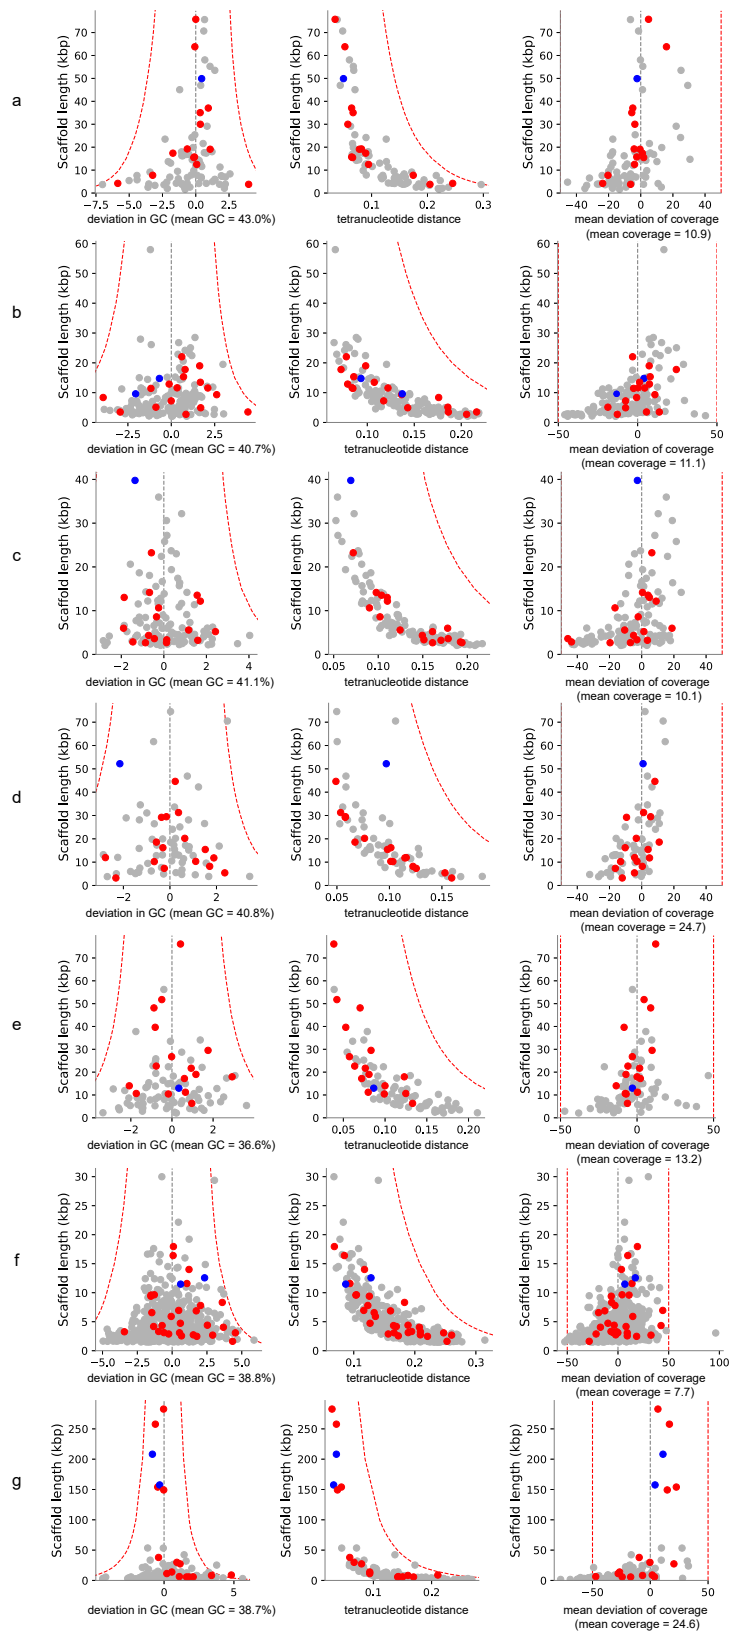

**Supplementary Fig. 3.** Statistical characteristics of contigs constituting the ‘*Ca.* Methylarchaeales’ genomes (a, H03B1; b, HK01M; c, HK01B; d, HK02M1; e, HK02M2; f, TDP8; g, TDP10.). The contig length was plotted as a function of the GC deviation, tetranucleotide distance and coverage deviation. Each dot in these scatterplots represents a contig. Contigs containing the *mcrABG* and *hdrDE* genes were labeled with blue; contigs containing the *vhtAGC* genes were labeled with purple; red dots are contigs with other methane metabolism-related genes. The dashed red lines indicate the 95<sup>th</sup> percentile of a typical genome computed with RefineM. *mcr*, methyl-coenzyme M reductase; *hdr*, heterodisulfide reductase; *vht*, methanophenazine-reducing hydrogenase.

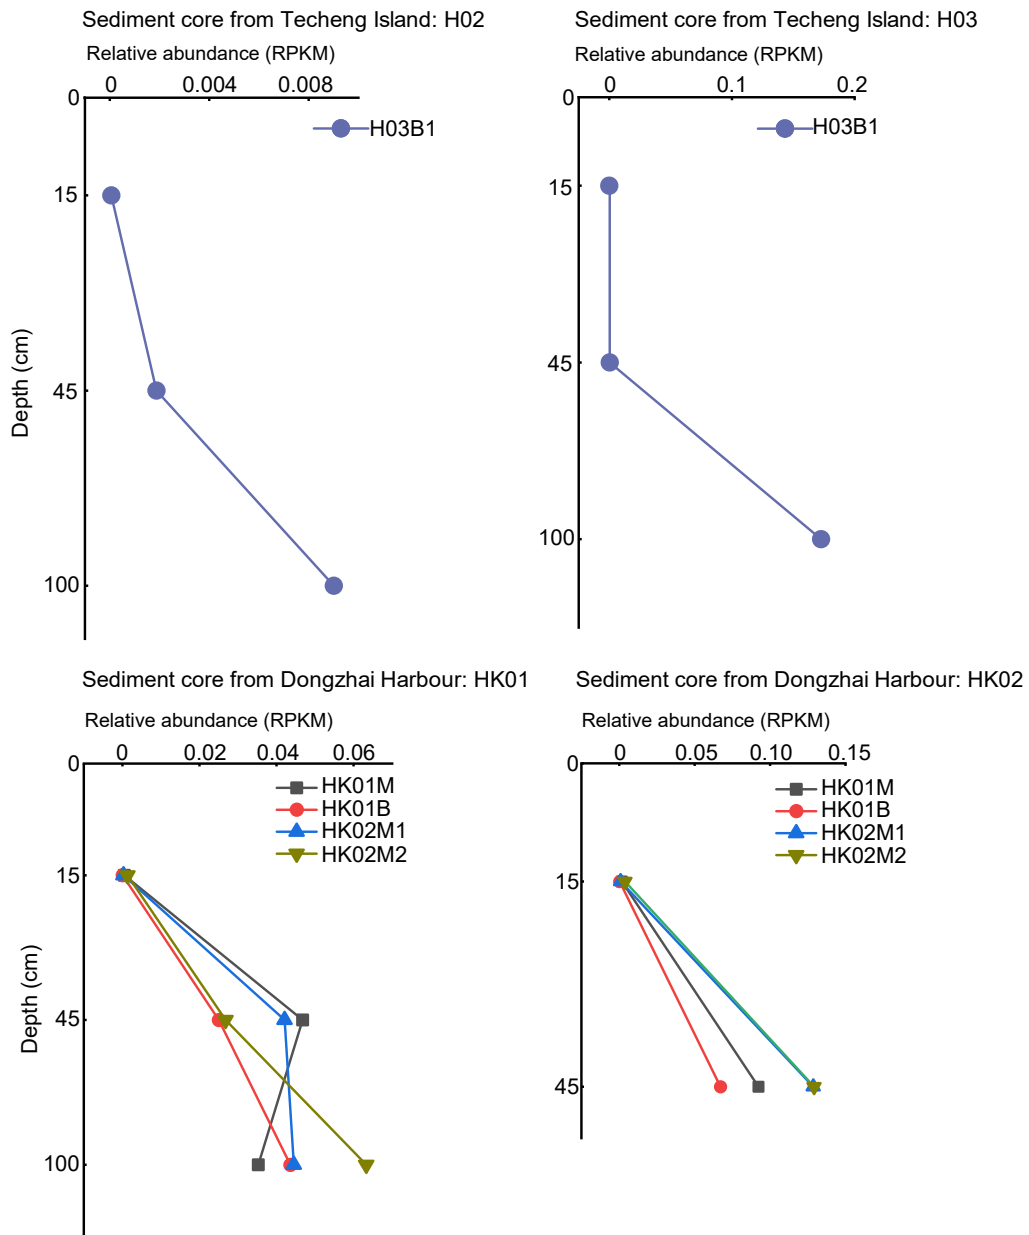

**Supplementary Fig. 4.** Relative abundance of the ‘*Ca. Methylarchaeales*’ genomes in sediment cores collected from their sampling sites (mangrove wetlands in Techeng Island and Dongzhai Harbour). Relative abundance was represented by reads per kbp of each genome per Mbp of each metagenome (RPKM; (reads recruited to a genome/(length of genome in bp/1,000))/(total bp in metagenome/1,000,000)).



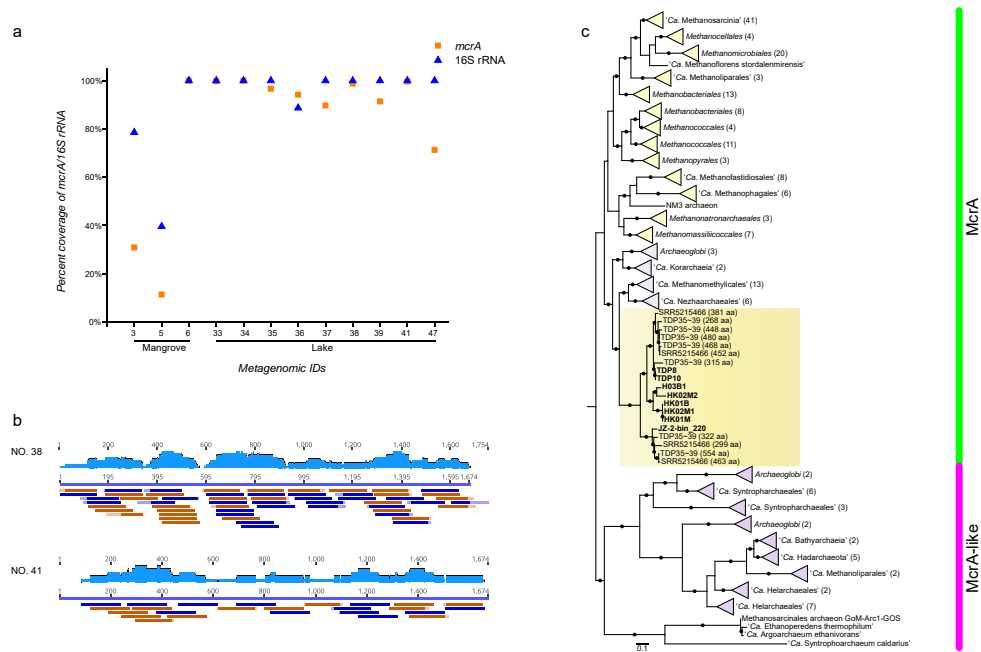

**Supplementary Fig. 5.** Comparison of the ‘*Ca. Methylarchaeales*’ 16S rRNA and *mcrA* genes to sequence reads from metagenomes generated from mangrove and lake sediment. **a.** The percent coverage information of reads recruited to ‘*Ca. Methylarchaeales*’ 16S rRNA and *mcrA* genes in 13 metagenomes. The highest percent coverage in each metagenome was presented. The metagenomic IDs on X axis correspond to those in Supplementary Table 3. **b.** Metagenomic reads mapping to the *mcrA* gene of the ‘*Ca. Methylarchaeales*’. Samples NO. 38 and NO. 41 represent metagenomes generated from Lake Towuti and Gulf of Boni, respectively. Detailed information about metagenomes is provided in Supplementary Table 3. Reads in blue and dark orange are reads mapped in forward and reverse orientation, respectively. **c.** Phylogenetic tree of the methyl-coenzyme M reductase (Mcr)/Mcr-like subunit A constructed using IQ-TREE (-m TEST LG+F+I+G4, -bb 1000), showing the position of McrA fragments (> 250 aa) recovered from metagenomes (in yellow). These McrA fragments clustered with McrA sequences of the ‘*Ca. Methylarchaeales*’ MAGs (in bold). SRR5215466, sediment metagenome from Gulf of Boni, Indonesia; TDP, ID 35-39 metagenomes generated from sediments of Lake Towuti, Indonesia (Supplementary Table 3).

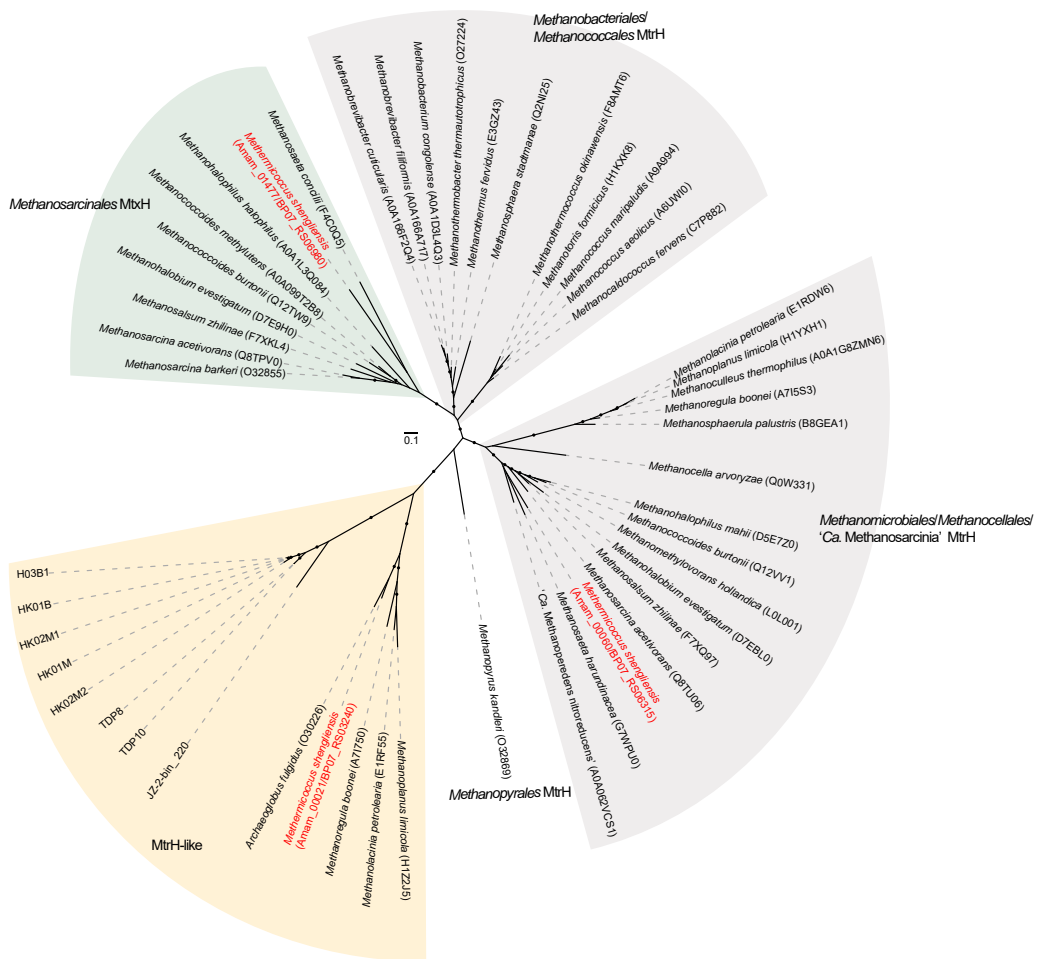

**Supplementary Fig. 6.** Phylogenetic analysis of methyl-tetrahydromethanopterin:coenzyme M methyltransferase subunit H. MtrH reference sequences were derived from a previous study [13]. Ultrafast bootstraps values  $\geq 95$  are indicated with black dots.

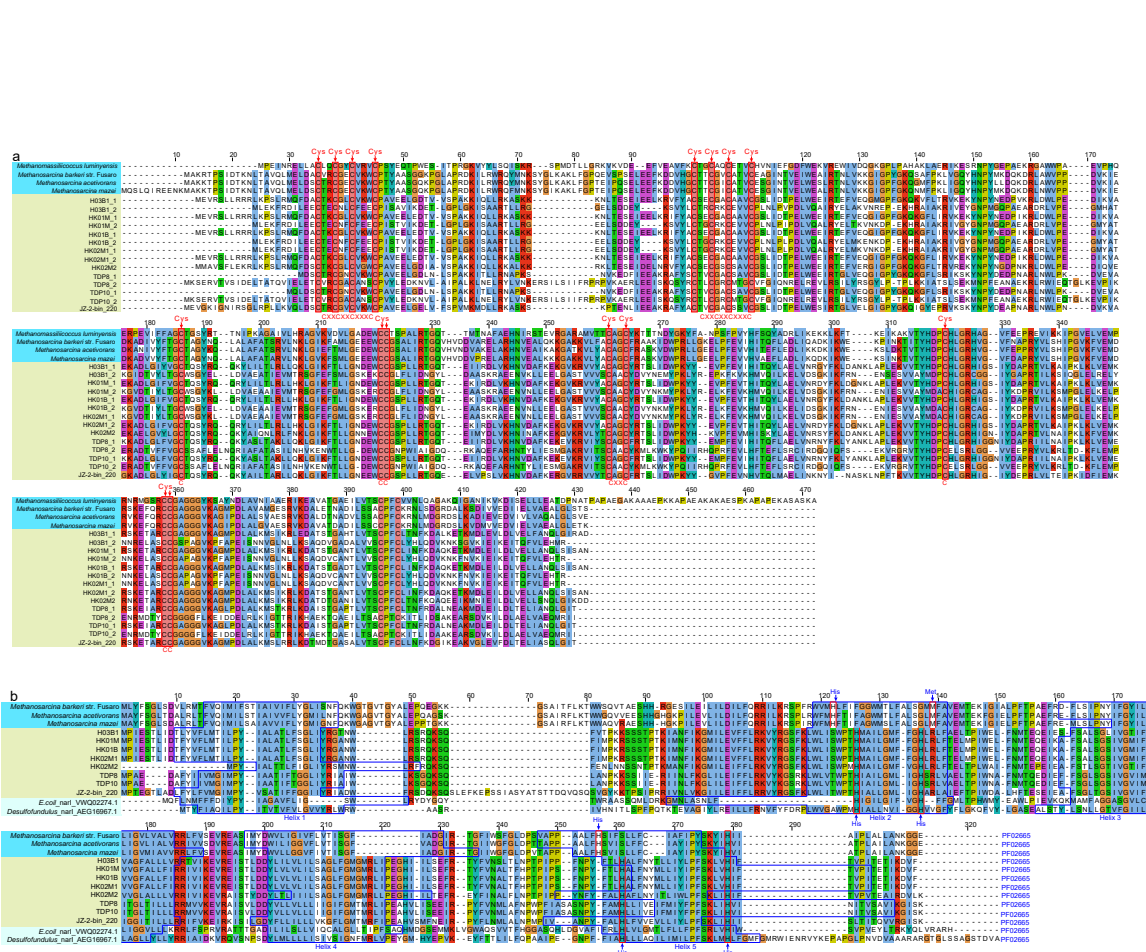

**Supplementary Fig. 7.** Multiple sequence alignment of heterodisulfide reductase subunit D (HdrD) and E (HdrE) sequences. **a.** Comparison of the ‘*Ca. Methyloarchaeales*’ HdrD with known *Methanosarcina* and *Methanomassiliicoccus* HdrD. Cysteines which interact with Fe-S clusters and are located in cysteines-rich motifs are labeled with red boxes [14]. **b.** Comparison of the ‘*Ca. Methyloarchaeales*’ HdrE with *Methanosarcina* HdrE and bacterial NarI. The blue box represents the transmembrane region. Five transmembrane helices are indicated by blue boxes and arrows denote locations of histidine residues which can bind with heme groups [15].

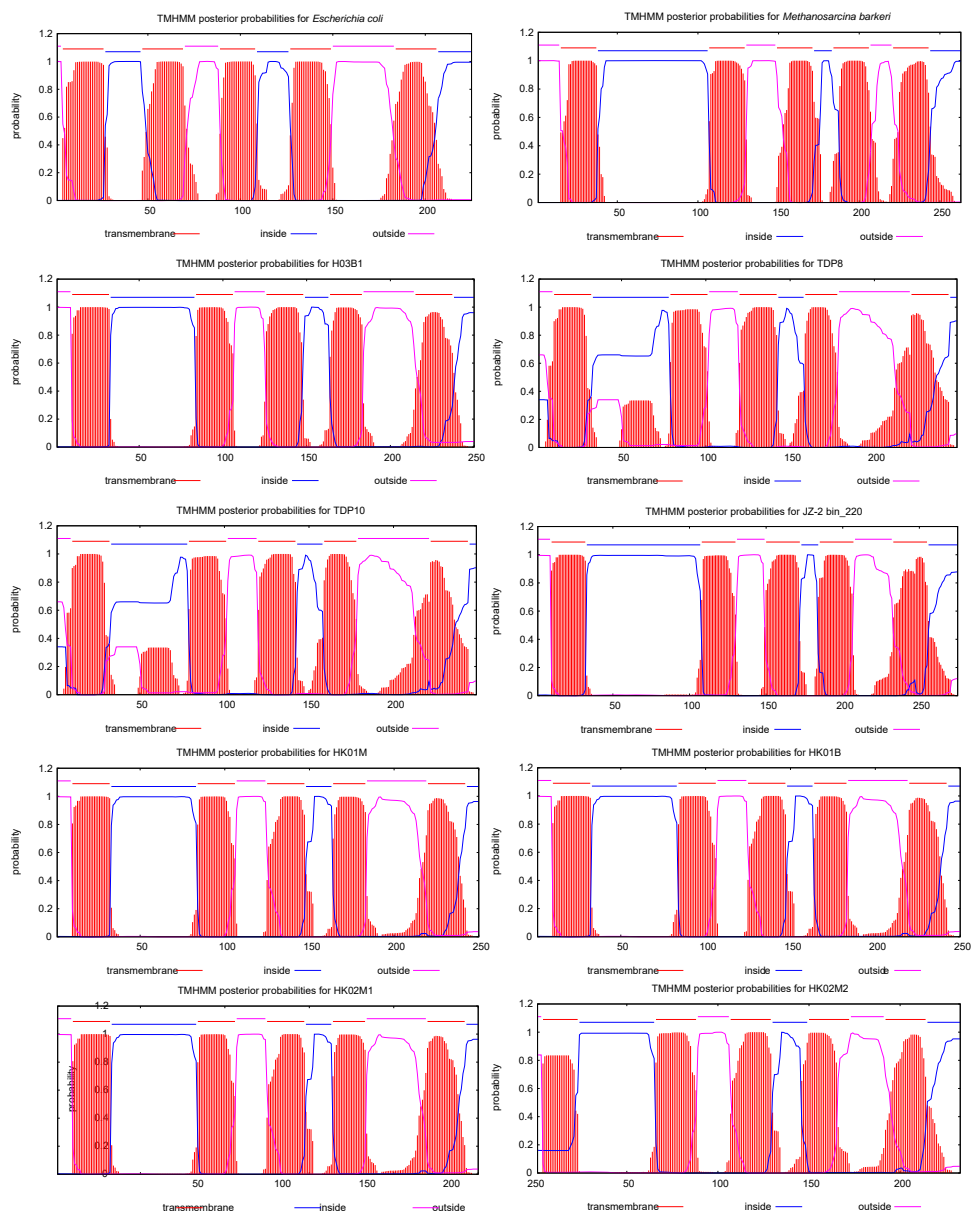

**Supplementary Fig. 8.** Prediction of transmembrane helices in the ‘*Ca. Methylarchaeales*’ heterodisulfide reductase subunit E (HdrE) sequences using TMHMM Server v. 2.0 (<http://www.cbs.dtu.dk/services/TMHMM/>). The *b*-type cytochrome of *Escherichia coli* (VWQ02274.1) and *Methanosarcina barkeri* HdrE (P96796.2) were used as controls.

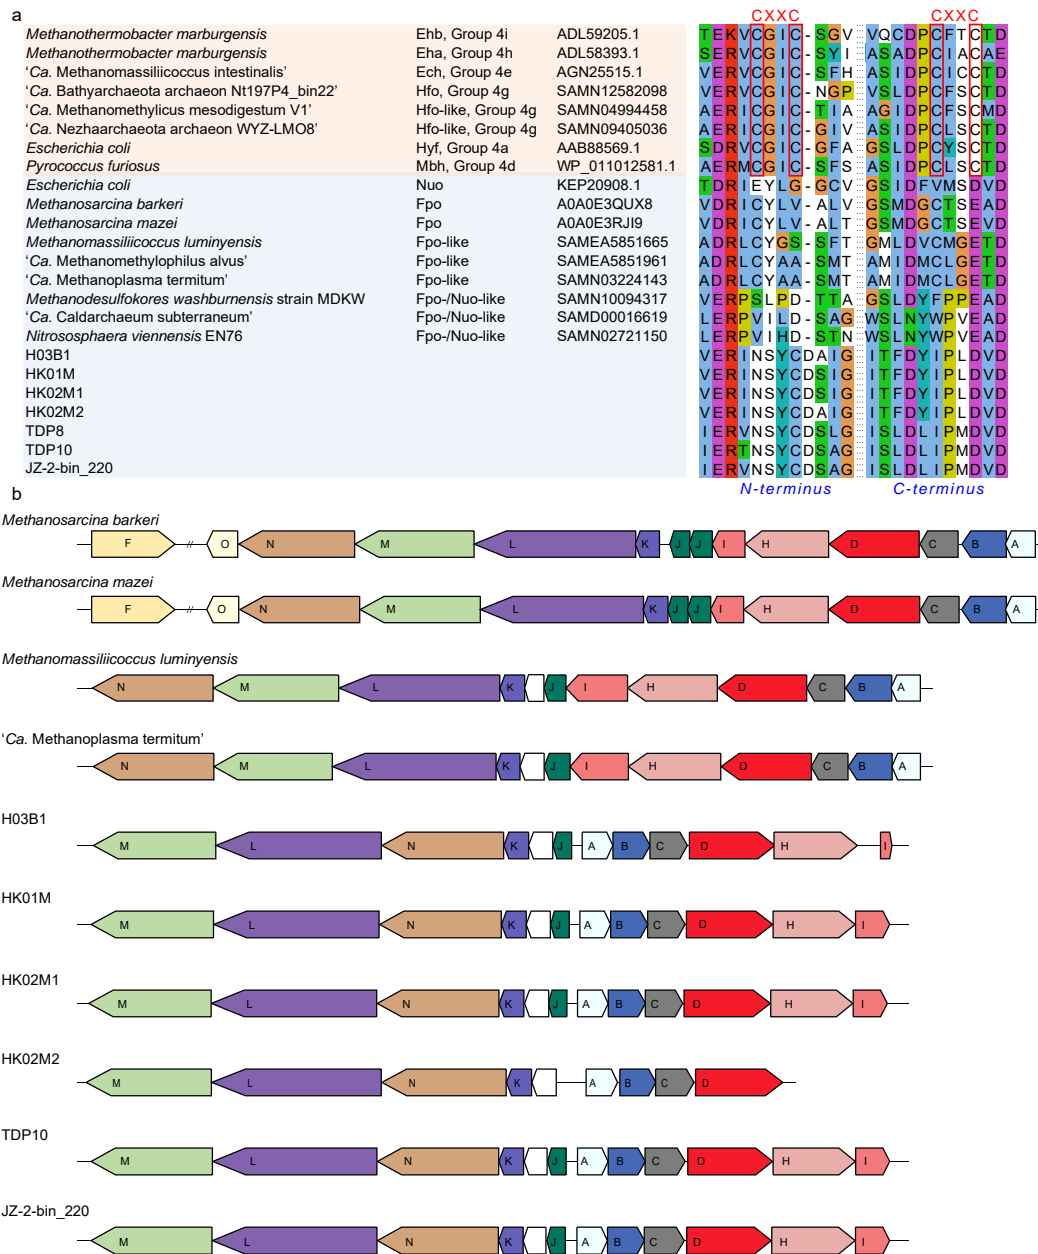

**Supplementary Fig. 9.** Comparison of the '*Ca. Methylarchaeales*'  $F_{420}H_2$  dehydrogenase-like (Fpo-like) with known Fpo, Fpo-like and group 4 [NiFe] hydrogenase. **a.** Sequence alignment of the large subunits of Fpo, Fpo-like and group 4 [NiFe] hydrogenase. The [NiFe]-binding motifs of group 4 [NiFe] hydrogenase are indicated by red boxes. **b.** Organization of the gene clusters encoding Fpo/Fpo-like complexes.

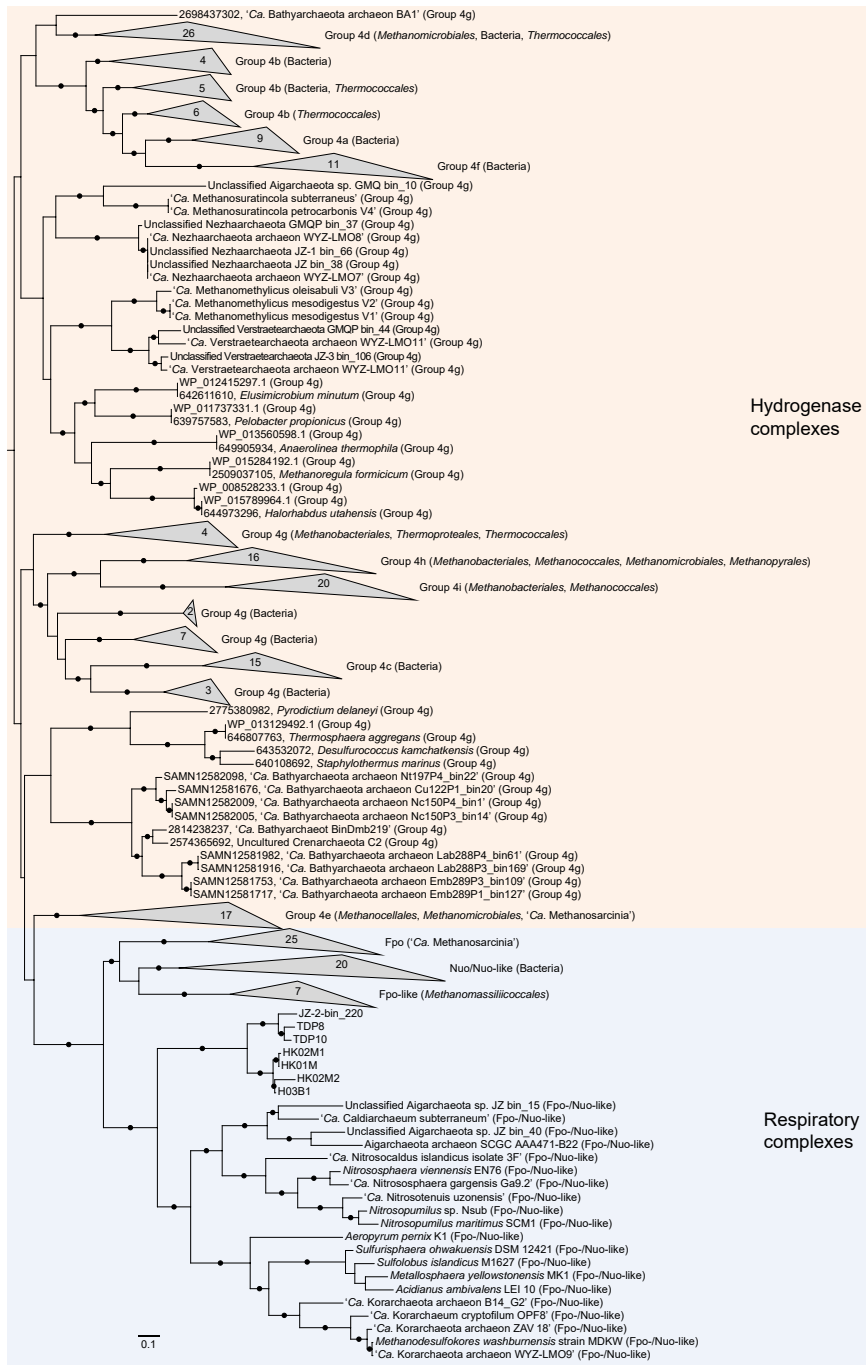

**Supplementary Fig. 10.** Phylogeny of the catalytic subunit of selected group 4 [NiFe] hydrogenases and their homologs in the respiratory complexes (Nuo, Fpo and Fpo-like). The catalytic subunit of selected group 4 [NiFe] hydrogenases sequences were downloaded from HydDB [16]. Ultrafast bootstraps values  $\geq 95$  are indicated with black dots.

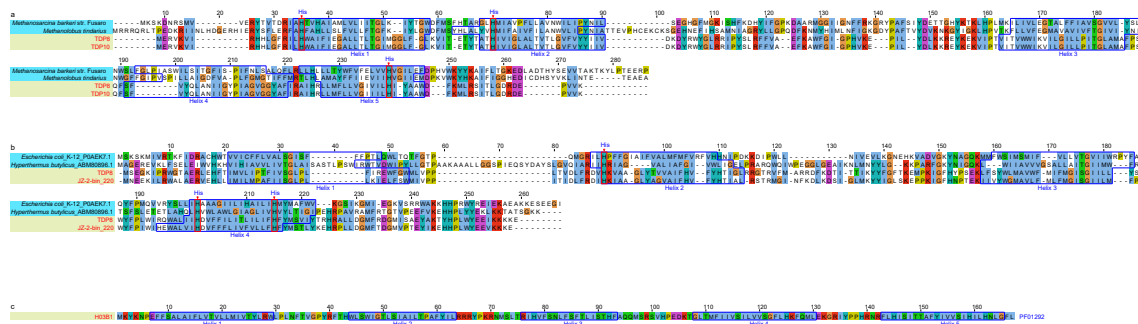

**Supplementary Fig. 11.** Multiple sequence alignment of methanophenazine-reducing hydrogenase cytochrome *b* subunit (VhtC) sequences (a) and formate dehydrogenase gamma subunit (FdhC) sequences (b, c). **a.** Comparison of the ‘*Ca. Methylarchaeales*’ VhtC with that of cultured *Methanosarcina barkeri* str. Fusaro and *Methanolobus tindarius*. **b.** Comparison of the ‘*Ca. Methylarchaeales*’ FdhC with that of *E. coli* k-12 and *Hyperthermus butylicus*. **c.** The putative FdhC sequence from the H03B1 genome identified using HMMER based on prokaryotic cytochrome *b*<sub>561</sub> domain (PF01292). It possesses five transmembrane helix regions which is different from *E. coli* k-12 FdhC. The transmembrane helix regions are indicated by blue boxes. The histidine residues that bind heme are labeled with red boxes.

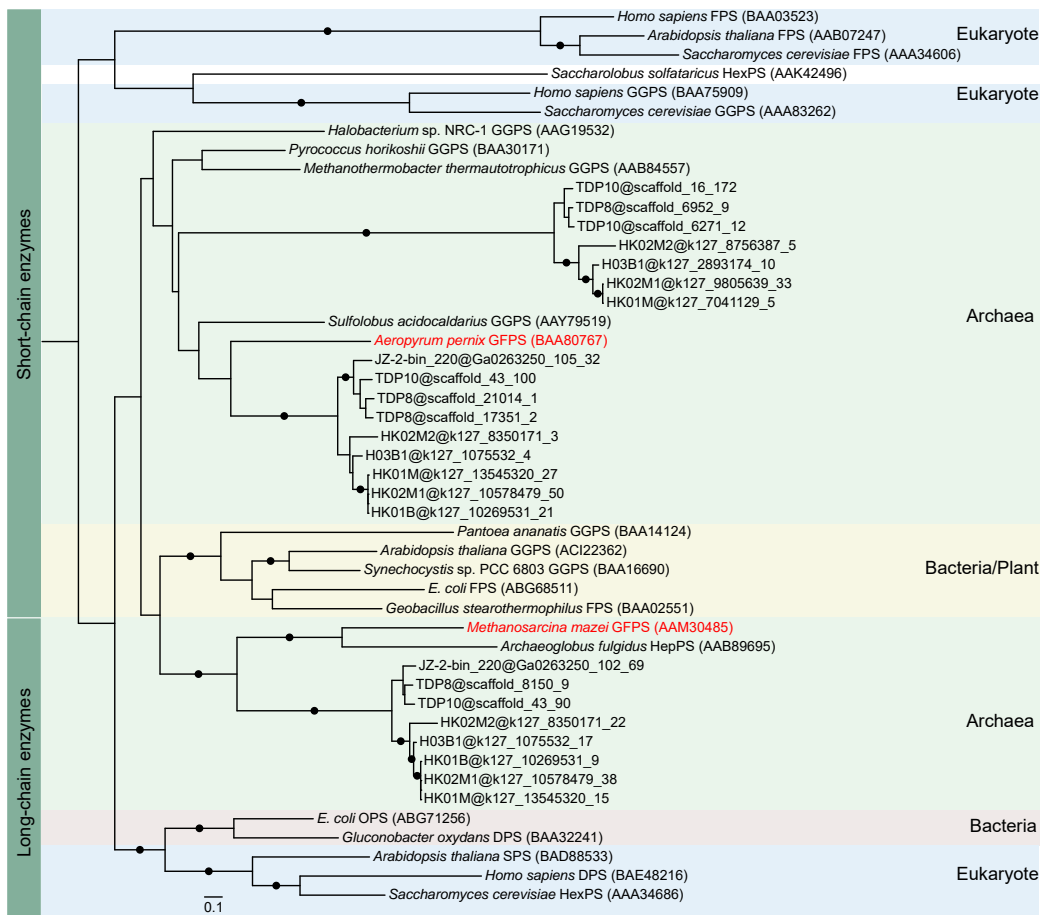

**Supplementary Fig. 12.** Phylogenetic tree of (all-E) prenyl diphosphate synthases. The reference sequences were derived from a previous study [17]. The geranylarnesyl diphosphate synthase (GFPS) which is involved in methanophenazine biosynthesis is indicated with red. Gene numbers indicate protein accession IDs from NCBI. Ultrafast bootstraps values  $\geq 95$  are indicated with black dots.



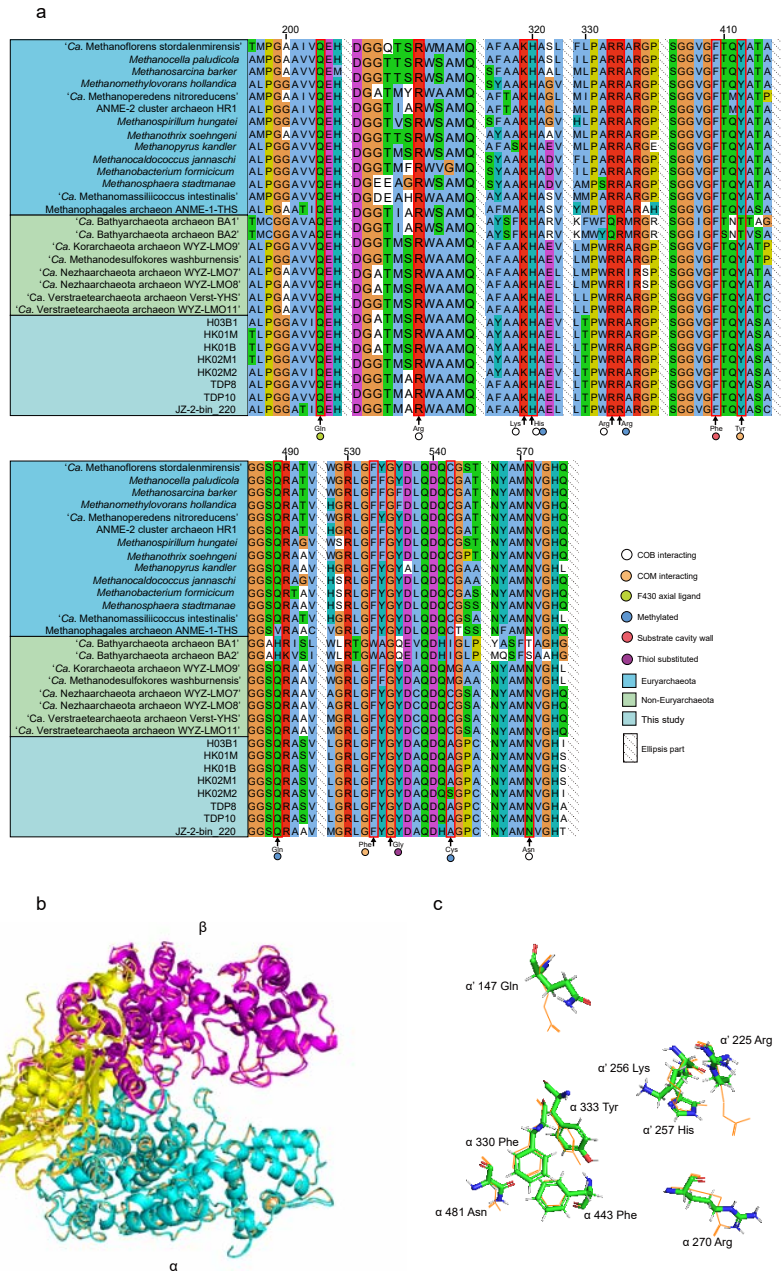

**Supplementary Fig. 13.** Conserved active sites of McrA (a) and structural model of the H03B1 Mcr complex (b and c). **a.** Key amino acid residues identified by Ermler et al. [11] including binding sites for CoM, CoB, and F<sub>430</sub> are shown. **b.** Models of the  $\alpha$  (cyan),  $\beta$  (magenta), and  $\gamma$  (yellow) subunits of H03B1 Mcr overlaid on the corresponding subunits (orange) of the *Methanosarcina barkeri* crystal structure (PDB ID: 1e6y). **c.** Model of the activate sites of the McrA subunits (sticks) of H03B1 superimposed onto McrA (orange ribbon) of *Methanosarcina barkeri*.

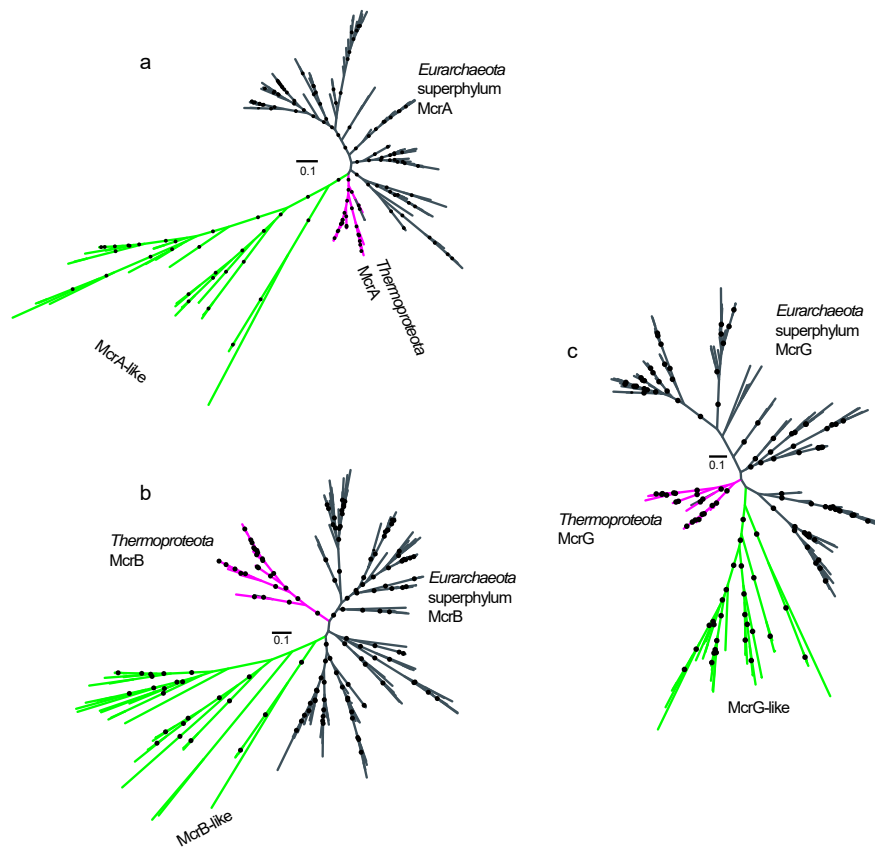

**Supplementary Fig. 14.** Phylogenetic trees of the methyl-coenzyme M reductase (Mcr)/Mcr-like complex subunits (a McrA/McrA-like, b McrB/McrB-like, and c McrG/McrG-like) constructed using IQ-TREE. The trees include 167 archaeal genomes with Mcr/Mcr-like complex. The model used was LG+F+I+G4 for *mcrA* and *mcrB* genes, and LG+G4 for *mcrG* gene. Members of *Euryarchaeota* superphylum and *Thermoproteota* phylum are represented by dark-green branches and pink branches, respectively. Mcr-like complex is indicated with green branches. Ultrafast bootstraps values  $\geq 95$  are indicated with squares.

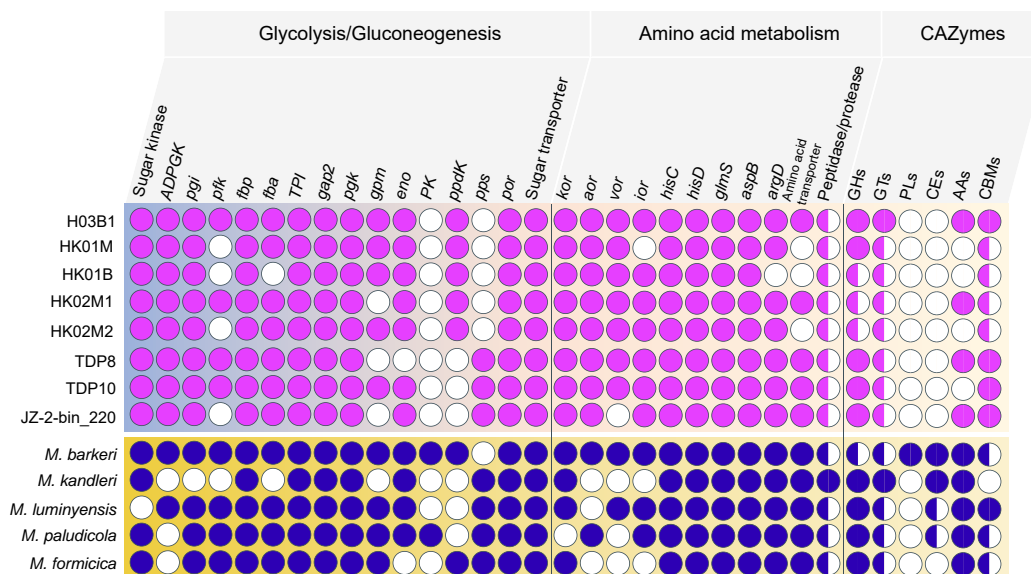

**Supplementary Fig. 15.** Distribution of key genes involved in glycolysis/gluconeogenesis, and amino acid and carbohydrate metabolism in the ‘*Ca. Methylarchaeales*’ and cultivated methanogens. The semicircle indicates the kind of enzymes that are predicted to be either extracellular or intracellular. The filled circle indicates the enzymes that are predicted to be intracellular. The empty circle represents the absence of these enzymes. For abbreviation of the genes in glycolysis/gluconeogenesis and amino acid metabolism, their full gene name is presented in Supplementary Table 7. CAZymes, carbohydrate-active enzymes; PK, pyruvate kinase; GHs, glycoside hydrolases; GTs, glycosyl transferases; PLs, polysaccharide lyases; CEs, carbohydrate esterases; AAs, auxiliary activities; CBMs, carbohydrate-binding modules; *M. barkeri*, *Methanosarcina barkeri* str. Fusaro; *M. kandleri*, *Methanopyrus kandleri*; *M. luminyensis*, *Methanomassiliicoccus luminyensis*; *M. paludicola*, *Methanocella paludicola*; *M. formicica*, *Methanoregula formicica*.

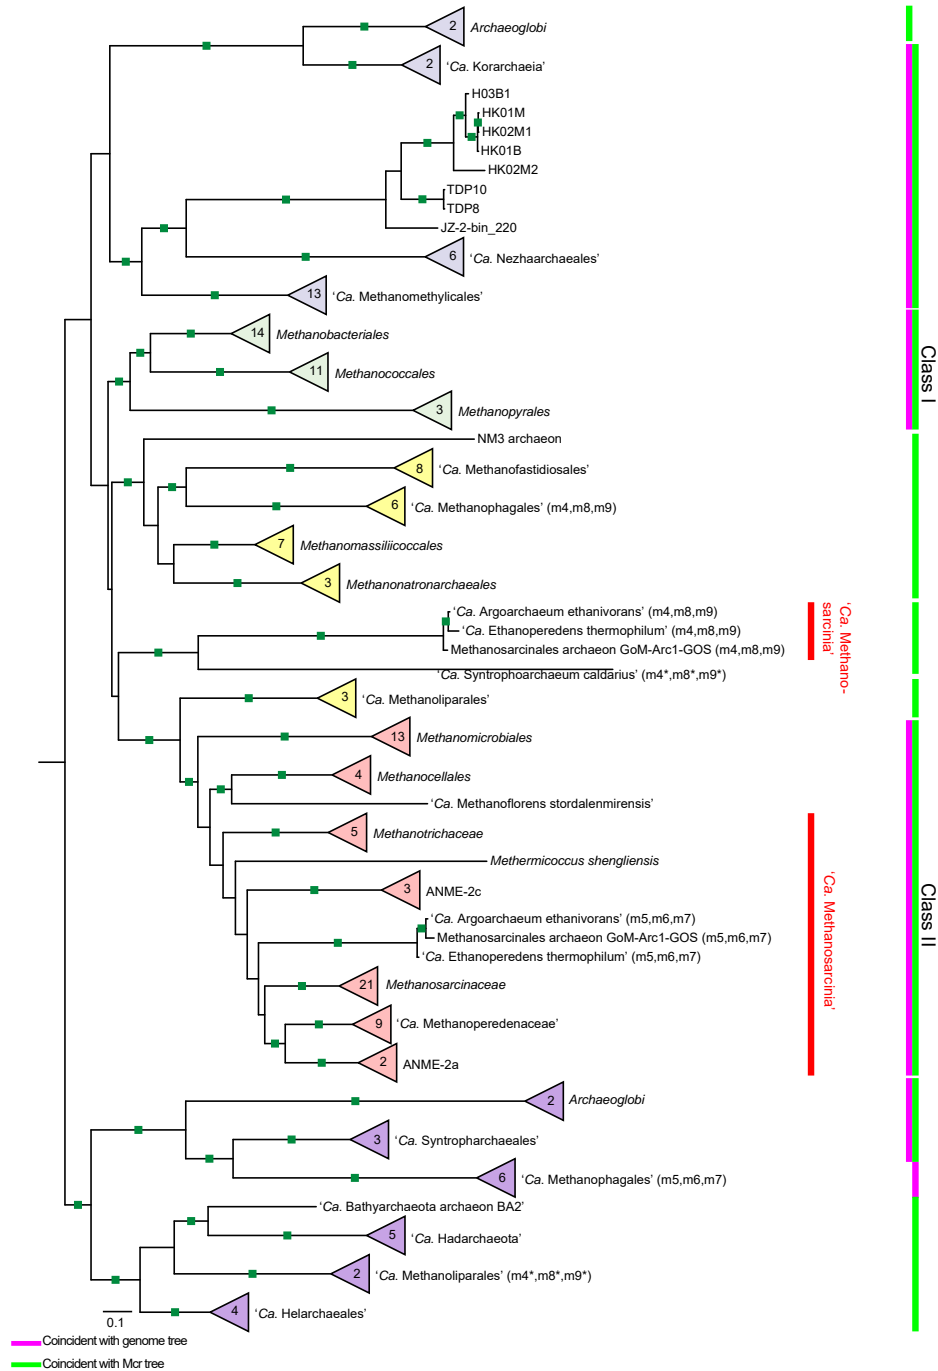

**Supplementary Fig. 16.** The maximum-likelihood phylogeny (IQ-TREE, LG+C60+F+G) based on a concatenation of markers m4 to m9 from 164 *mcr*-containing archaeal genomes. The bootstrap support values  $\geq 95$  are indicated with green filled squares. For the '*Ca. Methanophagales*', '*Ca. Argoarchaeum ethanivorans*', Methanosarcinales archaeon GoM-Arc1-GOS and '*Ca. Ethanoperedens thermophilum*', their markers are divided into two incongruent parts which are individually concatenated and displayed in front of the corresponding branches. As for extra copies of m4, m8 and m9 in '*Ca. Syntrophoarchaeum caldarius*' and '*Ca. Methanoliparales*', they are individually concatenated and labeled with asterisk. Vertical lines in front of the phylogeny indicate that the corresponding sections are congruent with the species tree (pink) and/or the concatenated McrABG/McrABG-like tree (green) (Fig 4).

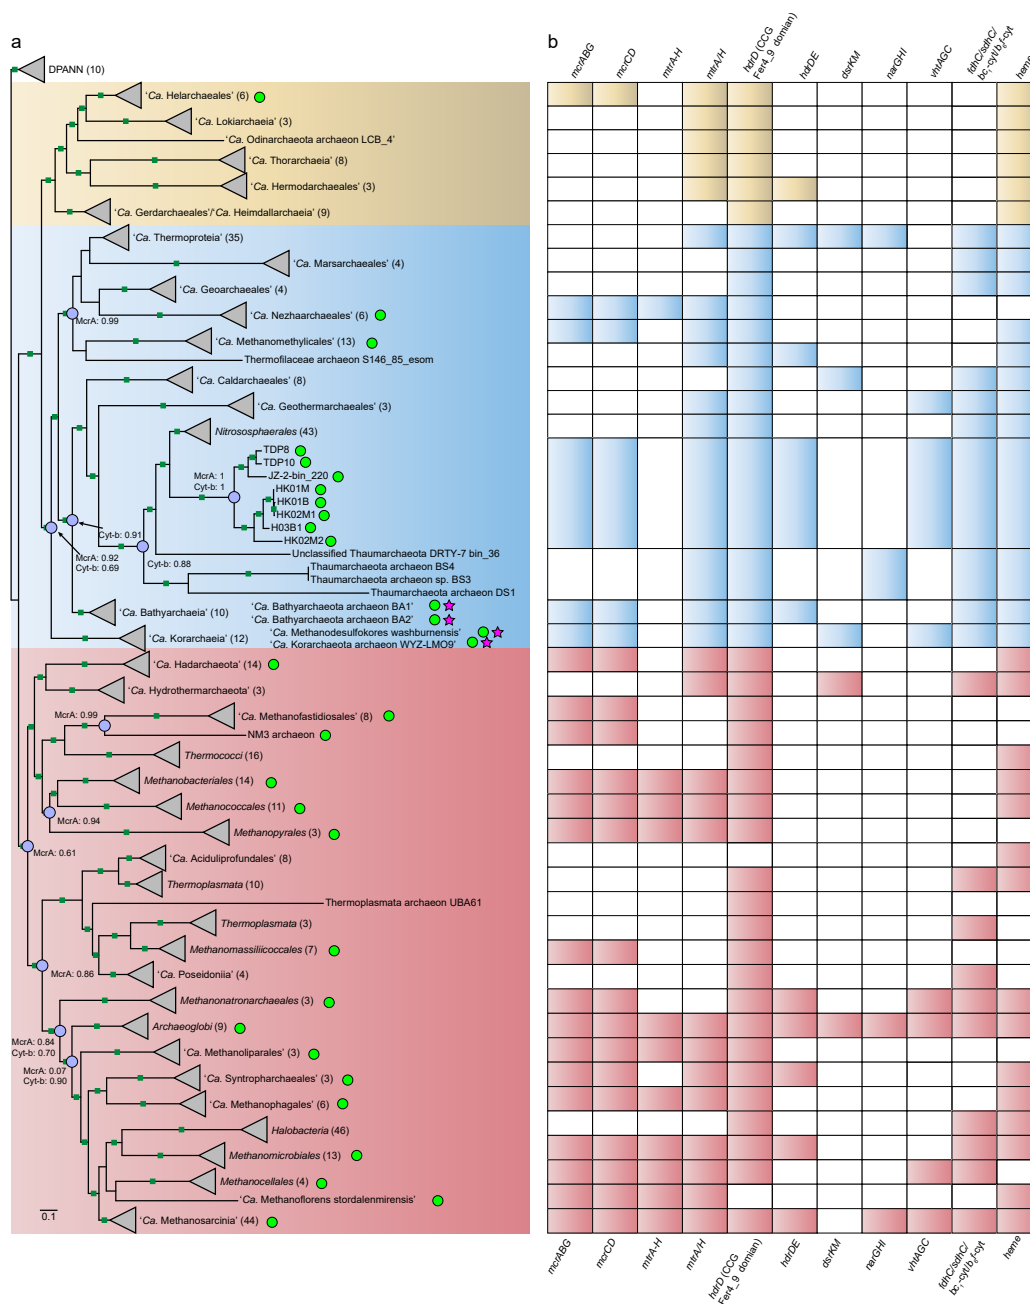

**Supplementary Fig. 17.** Genome tree and distribution of genes for Mcr complex and energy-conserving complexes in archaea. **a.** Species tree based on concatenated 122 archaeal-specific marker proteins using 426 representative archaeal genomes. The tree is inferred with IQTREE (LG+C60+F+G, -bb 1000) and rooted between DPANN and all other archaea. The bootstrap support values  $\geq 95$  are indicated with green squares. The branches with the Mcr/Mcr-like complex are marked with green circle. Asterisk in front of BA1, BA2, WYZ LMO9, and MDKW indicates that these genomes lack the HdrDE complex. **b.** Presence and absence of key genes related to cytochrome *b*-containing methanogens in main archaeal lineages. For *mtrA-H*, it was regarded as present if  $\geq 80\%$  of the subunit genes constituting these complexes were identified. For other complexes, they were regarded as present only when all subunit genes for these complexes were found. As for heme biosynthetic pathway, it was regarded as present if more than two of three key enzymes (Ahb-NirDH, Ahb-NirJ1 and Ahb-NirJ2) were identified in a genome. For archaeal lineages (order or phylum), if there is at least one genome in a lineage that was found to contain the genes above, the corresponding grid is shaded with color. Presence probability of McrA or *b*-type cytochrome in some nodes computed by ALE are indicated.



## Reference

1. Zhang Y. I-TASSER server for protein 3D structure prediction. *BMC Bioinf.* 2008;9:40.
2. Langmead B, Salzberg SL. Fast gapped-read alignment with Bowtie 2. *Nat Methods.* 2012;9:357.
3. Li H, Handsaker B, Wysoker A, Fennell T, Ruan J, Homer N, et al. The sequence alignment/map format and samtools. *Bioinformatics.* 2009;25:2078-2079.
4. Augusto LE, Fratini S, Jimenez PJ, Quadros A, Cannicci S. Structural characteristics of crab burrows in Hong Kong mangrove forests and their role in ecosystem engineering. *Estuarine, Coastal Shelf Sci.* 2021;248:106973.
5. Gao Y, Zhou J, Wang L, Guo J, Feng J, Wu H, et al. Distribution patterns and controlling factors for the soil organic carbon in four mangrove forests of China. *Glob Ecol Conserv.* 2019;17:e00575.
6. Quast C, Pruesse E, Yilmaz P, Gerken J, Schweer T, Yarza P, et al. The SILVA ribosomal RNA gene database project: improved data processing and web-based tools. *Nucleic Acids Res.* 2012;41:D590-D596.
7. Li H. Aligning sequence reads, clone sequences and assembly contigs with BWA-MEM. *arXiv.* 2013.
8. Yarza P, Yilmaz P, Pruesse E, Glöckner FO, Ludwig W, Schleifer KH, et al. Uniting the classification of cultured and uncultured bacteria and archaea using 16S rRNA gene sequences. *Nat Rev Microbiol.* 2014;12:635-645.
9. Storbeck S, Rolfes S, Raux Deery E, Warren MJ, Jahn D, Layer G. A novel pathway for the biosynthesis of heme in archaea: genome-based bioinformatic predictions and experimental evidence. *Archaea.* 2010;2010.
10. Kühner M, Haufschildt K, Neumann A, Storbeck S, Streif J, Layer G. The alternative route to heme in the methanogenic archaeon *Methanosarcina barkeri*. *Archaea.* 2014;2014.
11. Ermler U, Grabarse W, Shima S, Goubeaud M, Thauer RK. Crystal structure of methyl-coenzyme M reductase: the key enzyme of biological methane formation.

- Science. 1997;278:1457-1462.
12. Chaumeil PA, Mussig AJ, Hugenholtz P, Parks DH. GTDB-Tk: a toolkit to classify genomes with the genome taxonomy database. *Bioinformatics*. 2019;36:1925-1927.
  13. Kurth JM, Nobu MK, Tamaki H, de Jonge N, Berger S, Jetten MS, et al. Methanogenic archaea use a bacteria-like methyltransferase system to demethoxylate aromatic compounds. *ISME J*. 2021;15:3549-3565.
  14. Kröninger L, Berger S, Welte C, Deppenmeier U. Evidence for the involvement of two heterodisulfide reductases in the energy-conserving system of *Methanomassiliicoccus luminyensis*. *FEBS J*. 2016;283:472-483.
  15. Künkel A, Vaupel M, Heim S, Thauer RK, Hedderich R. Heterodisulfide reductase from methanol-grown cells of *Methanosarcina barkeri* is not a flavoenzyme. *Eur J Biochem*. 1997;244:226-234.
  16. Søndergaard D, Pedersen CN, Greening C. HydDB: a web tool for hydrogenase classification and analysis. *Sci Rep*. 2016;6:1-8.
  17. Ogawa T, Yoshimura T, Hemmi H. Geranyl-farnesyl diphosphate synthase from *Methanosarcina mazei*: different role, different evolution. *Biochem Biophys Res Commun*. 2010;393:16-20.
